# Supplementary material
Source: PubMed Central journal article supplement (PMC2798321)
Supplement: tpc.109.067041_1.pdf [file tpc.109.067041_1.pdf]

**Supplemental Figure 1.** Nitrate-specific, strong induction of *LBD37*, *LBD38*, *LBD39*.

Shown are induction levels of all *LBD* genes represented on the ATH1 GeneChip® (data from Scheible *et al.*, 2004; Morcuende *et al.*, 2007, Osuna *et al.*, 2007, data for sulfur-depletion unpublished). The bars depict the change of transcript level in N-limited seedlings 30 min after re-addition of 3 mM KCl (white hatched), 30 min after re-addition of 3 mM KNO<sub>3</sub> (light yellow), 3 h after re-addition of 3 mM KNO<sub>3</sub> (full yellow), and of nutrient-replete seedlings versus N-limited seedlings (dark yellow). Orange, blue and cyan bars show the change in the comparison of nutrient-replete seedlings versus carbohydrate (CHO), sulfur (S) and phosphorous (P)-limited seedlings, respectively. Data are from two biological replicates for each condition. Mean values and standard deviations (n=4) are shown and were calculated from crosswise comparisons of the biological replicates (cond. A repl 1 vs. cond. B repl. 1; cond. A repl 2 vs. cond. B repl. 1; cond. A repl 2 vs. cond. B repl. 2).

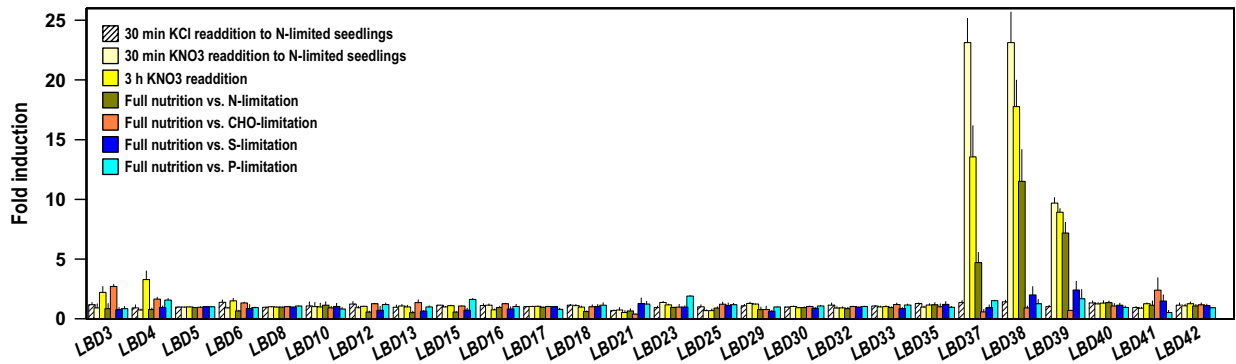

**Supplemental Figure 2.** Anthocyanin pigmentation phenotypes.

**(A)** Nine-day-old, N-limited WT and N-limited *LBD37*, *38* or *39* over-expressing seedlings. Photographs from independent experiments (top row, 2<sup>nd</sup> row) are shown. For *LBD37* over-expressers, two independent lines are shown in the second row. **(B)** Nine-day-old, nitrate-replete WT and nitrate-replete *lbd37-2*, *38* and *39* mutant seedlings. Two representative photos of different individuals are shown for each genotype. **(C)** Nine-day-old WT and *LBD37* OX seedlings grown in the cold (4°C), in the presence of 6% sucrose or under P-starvation conditions. **(D)** Nine-day-old, N-limited WT and N-limited *nla* mutant seedlings. Bars = 4 mm.

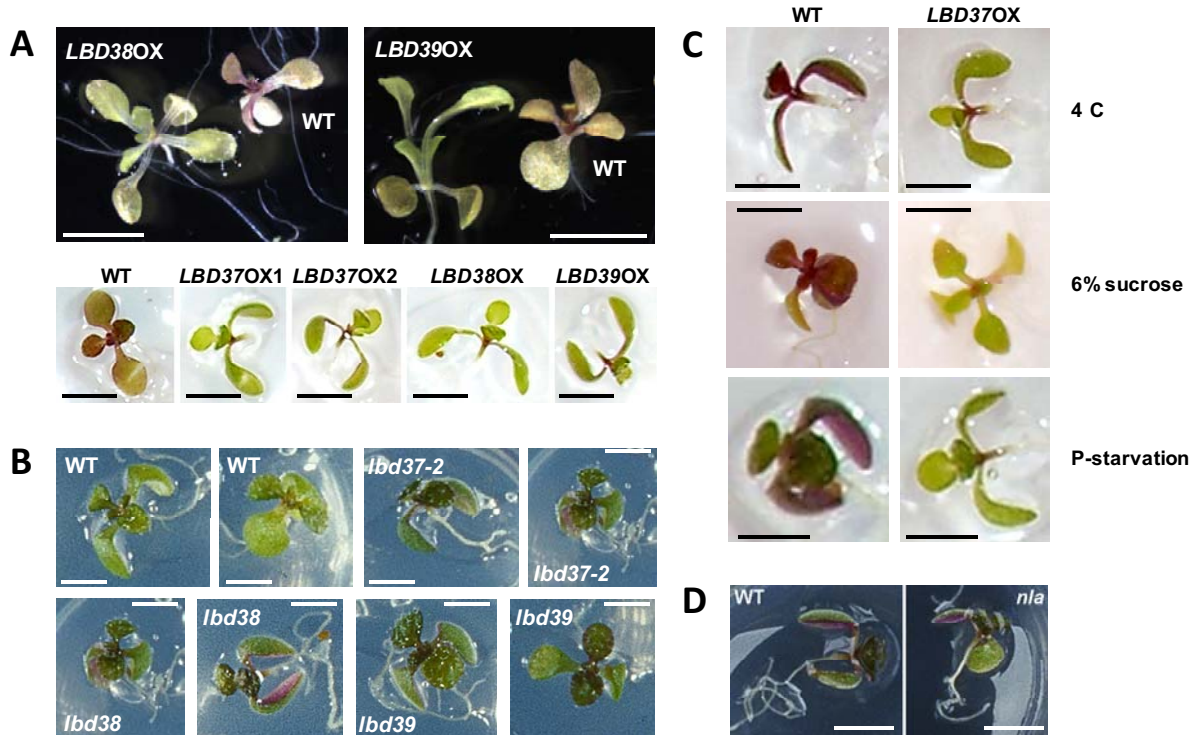

**Supplemental Figure 3.** Nuclear localization of GFP-LBD37 fusion protein.

(A, B) Compared to N-limited WT (A) N-limited seedlings expressing GFP-LBD37 under control of the 35S CaMV promoter (B) display reduced anthocyanin levels. (C) GFP signal and chlorophyll fluorescence in leaf epidermal cells of a *35S:GFP-LBD37* line. The size of the scale bar is 34  $\mu\text{m}$ . (D) GFP signal in the nucleus of a *35S:GFP-LBD37* leaf mesophyll cell. (E) DAPI staining of the same cell as in (D). (F) no GFP signal is detected in the negative control i.e. WT leaf mesophyll cells. (G) DAPI staining of the tissue sample shown in (F). The full sizes of the scale bars in (D) and (F) are 10  $\mu\text{m}$ , and apply to (E) and (G), respectively.

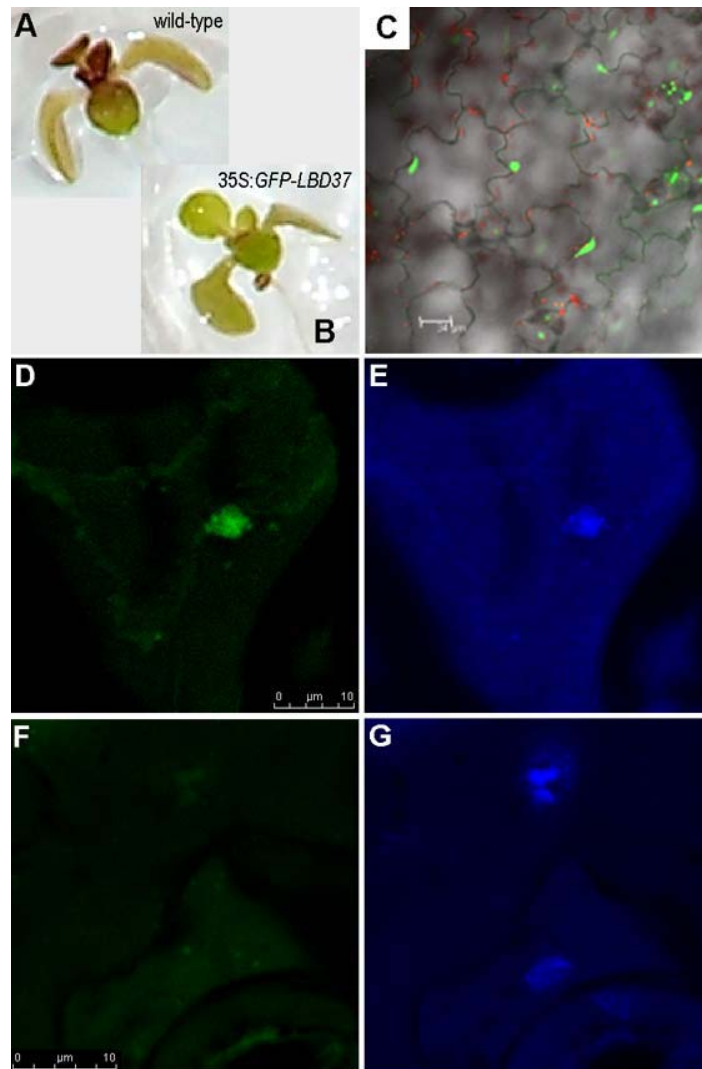

**Supplemental Figure 4.** Flavonoid levels and lignin staining.

Contents of seven detected cyanidin and flavonol glycoside species in shoot-material from  $\text{NO}_3^-$ -fed (FN, black horizontal bar) and N-limited (N limitation, white horizontal bar) WT (black vertical bars, two independent batches), *LBD37* OXs (white bars, two independent lines) and *LBD38* OXs (grey bars, two independent lines). **(A)** Cyanidin glycoside A11. **(B)** Cyanidin glycoside A9. **(C)** Quercetin glycoside F6. **(D)** Quercetin glycoside F5. **(E)** Kaempferol glycoside F3. **(F)** Kaempferol glycoside F2 or F4. **(G)** Kaempferol glycoside F1. Results are mean values  $\pm$  standard deviations from three biological replicates for each genotype. For more details about structure and naming of these cyanidin- and flavonol-glycosides see legend to Figure 4 and Tohge *et al.* (2005). **(H)** Phloroglucinol staining of stem cross-sections of four-week-old WT and *LBD* OX lines. Bar = 0.5 mm.

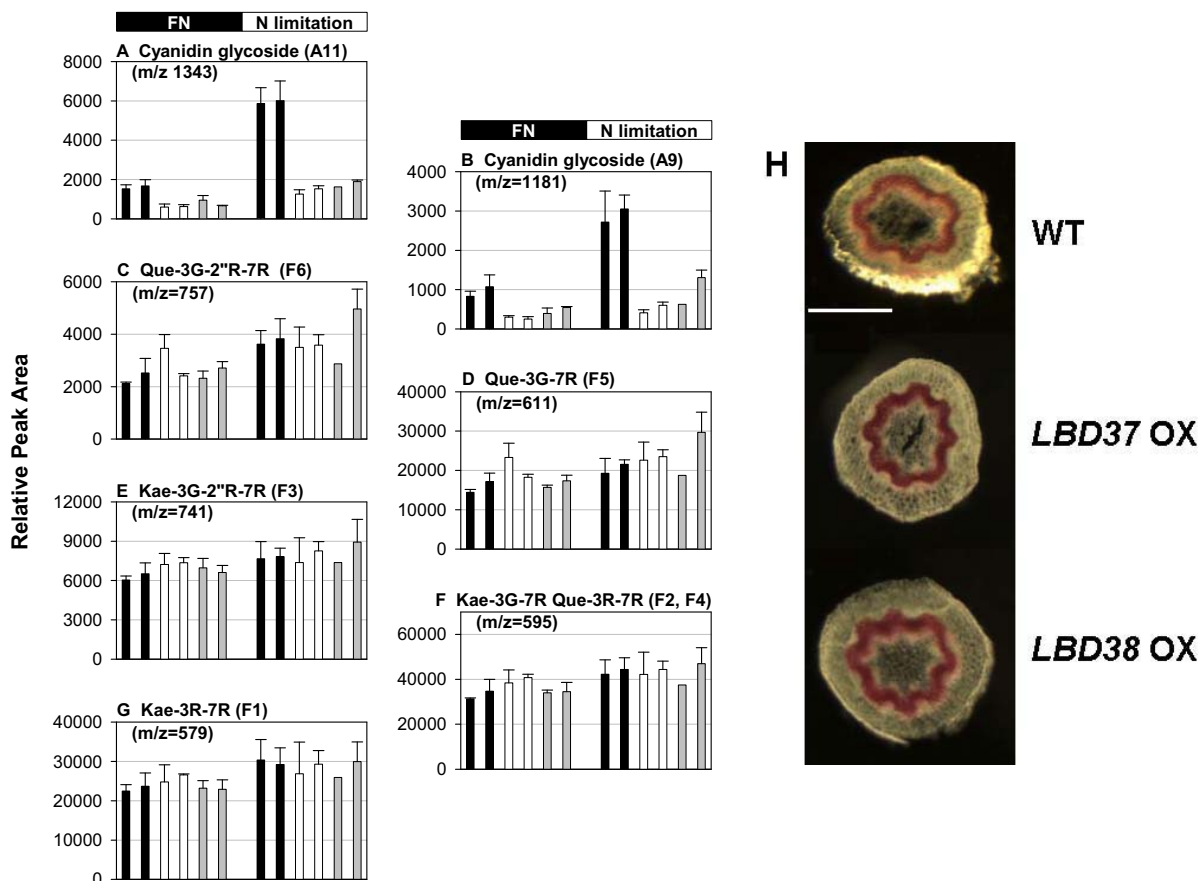

**Supplemental Figure 5.** Expression of late flavonoid pathway genes and regulators in *lbd37*, *lbd38* and *lbd39* mutants.

**(A)** Relative expression levels are shown for NO<sub>3</sub><sup>-</sup>-sufficient *lbd37-1*, *lbd37-2*, *lbd38* and *lbd39* mutant seedlings (blue, dark blue, red and green bars, respectively) versus NO<sub>3</sub><sup>-</sup>-sufficient WT seedlings. **(B)** Relative expression levels (*lbd37-1*, *lbd38* and *lbd39* mutant (blue, red and green bars, respectively) versus WT) in seedlings grown in N-limitation and resupplied with 3 mM NO<sub>3</sub><sup>-</sup> for 30 min. Note the logarithmic character of the y-axis, where e.g. a  $\Delta\Delta C_T = 2$  equals a  $(1+E)^2$ -fold change in expression, depending on primer efficiency (E) (cf. Supplemental Table 1). Results represent mean values  $\pm$  standard deviation from three independent biological replicates with two technical replicates for each.

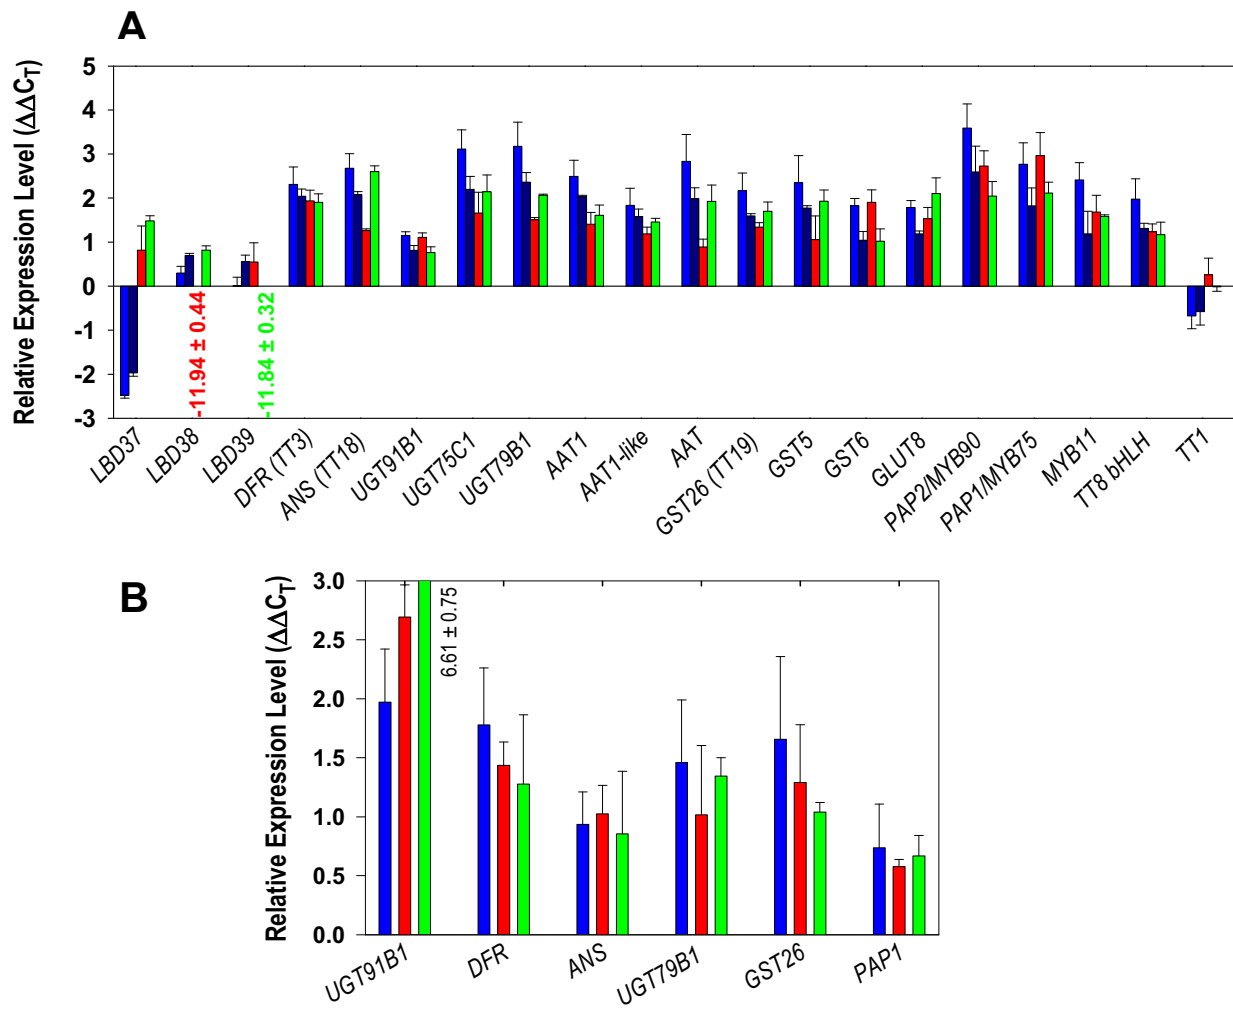

**Supplemental Figure 6.** QRT-PCR transcript profiling of early flavonoid pathway genes and regulators.

**(A)** Phenylpropanoid and early flavonoid pathway genes. **(B)** Regulatory genes.

Shown are relative expression changes in  $\text{NO}_3^-$ -fed versus N-limited WT (black bars), in the  $\text{NO}_3^-$ -fed *PAP1* over-expressing *pap1-D* activation tagging line versus  $\text{NO}_3^-$ -fed WT (white bars) and in N-limited over-expressers of *LBD37* versus N-limited WT (grey bars). Results represent mean values  $\pm$  standard deviation from three independent biological replicates with two technical replicates for each. Note the logarithmic character of the y-axis.

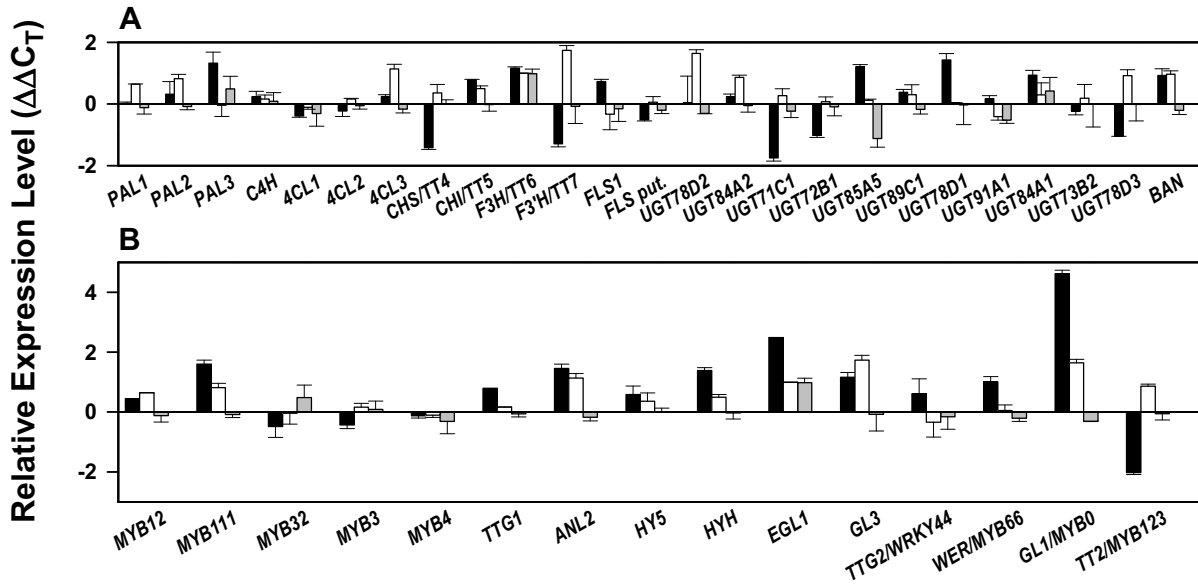

**Supplemental Figure 7.** Expression of flavonoid pathway genes and regulators in inducible *LBD37* OX lines.

Relative expression levels are shown for N-limited constitutive *LBD37* over-expressers versus N-limited WT seedlings (dark blue bars), N-limited inducible *LBD37* over-expressers (iOX) 3 hours after EtOH induction versus N-limited non-induced *LBD37* iOX (light blue bars), and N-limited inducible *LBD37* over-expressers (iOX) 6 hours after EtOH induction versus N-limited non-induced *LBD37* iOX (blue bars). Results represent mean values  $\pm$  standard deviation from three independent biological replicates/lines with two technical replicates for each. Note the logarithmic character of the y-axis.

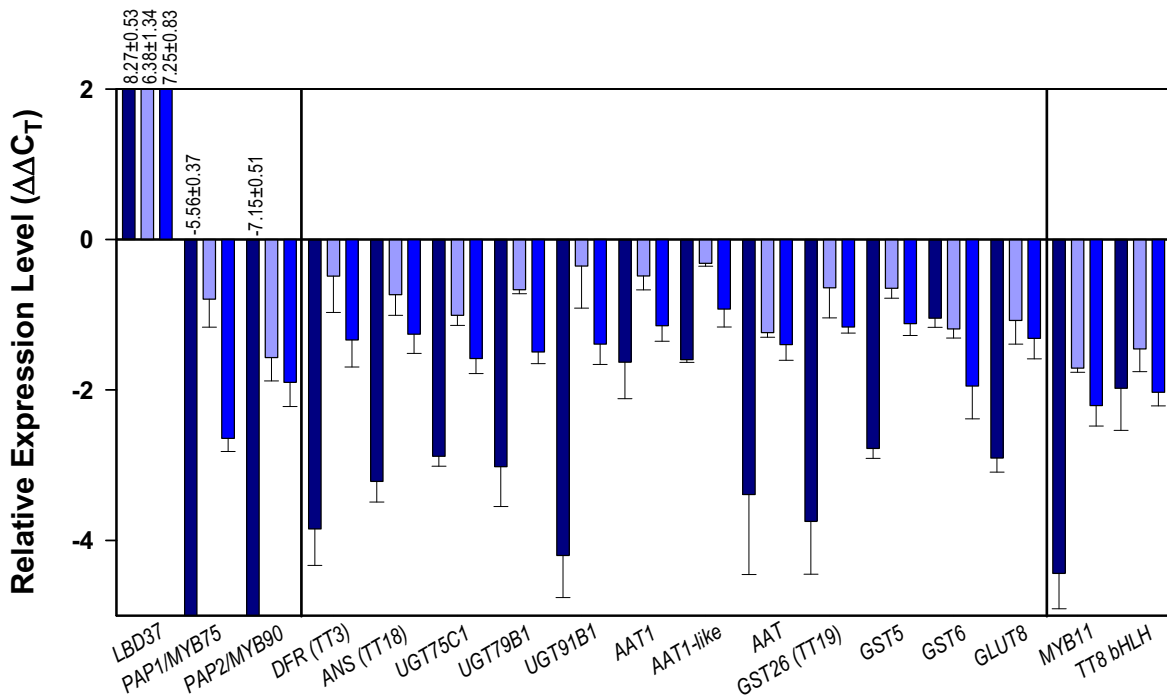

**Supplemental Figure 8.** Comparison of transcriptome changes in response to nitrogen status and *LBD37* or *LBD38* over-expression.

Shown in the Venn diagram (cf. Figure 7) are the numbers of gene transcripts that are  $\geq 3$ -fold decreased (red numbers) or increased (blue numbers) in either N-limited *LBD37* (light red) or *LBD38* (light blue) OX seedlings or N-replete WT seedlings (grey) compared to N-limited WT seedlings. Data were calculated from the average

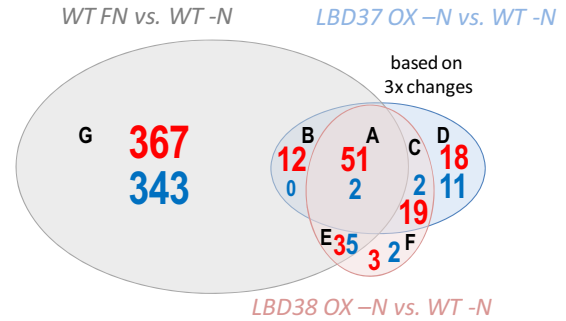

of three biological replicates for each condition (Supplemental Datasets 1 and 2 online). The sizes of the ellipses are chosen to be roughly proportional to the number of affected transcripts. Average responses of repressed genes (red numbers) from the seven sectors (A-G) of the Venn diagram are depicted in panels A-G, respectively. Selected genes are labeled. Only a small number of genes from sector G are depicted. Yellow lines indicate the threshold for three-fold repression. (H-J) RMA-normalized ATH1 hybridization signals of (H) genes involved in nitrate uptake and assimilation, (I) potential regulatory genes, and (J) genes involved in anthocyanin biosynthesis. Mean values  $\pm$  standard errors (n=3) are shown.

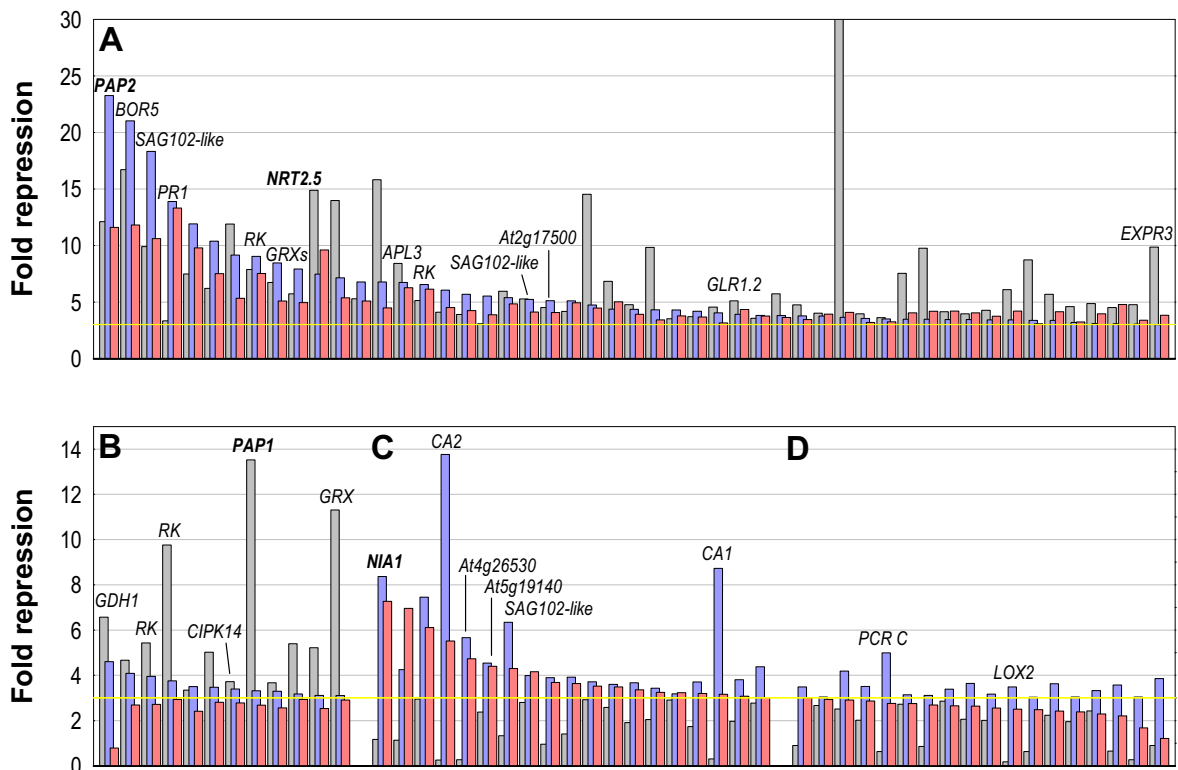



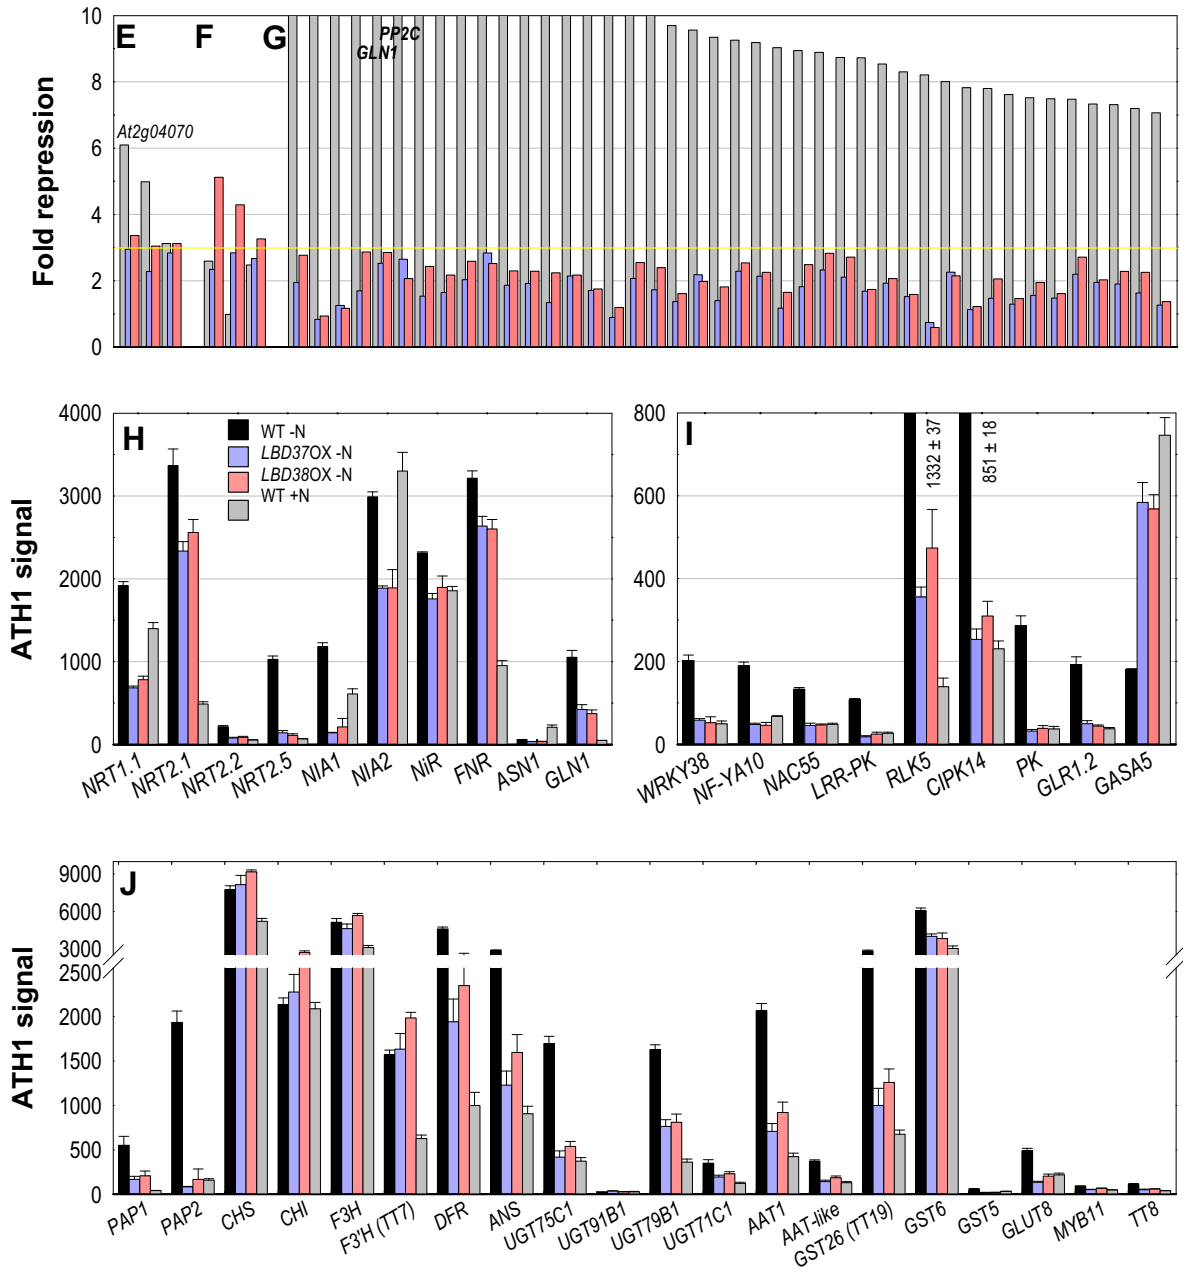

**Supplemental Figure 9.** Expression of *NRT2.1* and *NIA* genes in *LBD37* iOX lines and *lbd* mutant seedlings.

Shown are **(A)** relative expression levels of *NRT2.1*, *NIA1* and *NIA2* in N-limited ethanol-inducible *LBD37* over-expresser seedlings after 3 and 6 hours 0.2 % ethanol induction relative to N-limited ethanol-inducible *LBD37* over-expresser seedlings before induction (t0) (see graph for color explanation). For comparison the expression levels are also depicted for N-limited WT 3 hours after 3 mM  $\text{KNO}_3$  re-addition and during continuous growth in N-replete (FN) conditions relative to N-limited WT. **(B)** Relative expression levels of *NRT2.1*, *NIA1* and *NIA2* in WT and *lbd* mutant seedlings grown in N-limitation and resupplied with 3 mM  $\text{NO}_3^-$  for 30 min.

Note the logarithmic character of the y-axis, where e.g. a  $\Delta\Delta C_T = 2$  equals a  $(1+E)^2$  -fold change in expression, depending on primer efficiency (E) (cf. Supplemental Table 1). Results represent mean values  $\pm$  standard deviation from three independent biological replicates with two technical replicates for each.

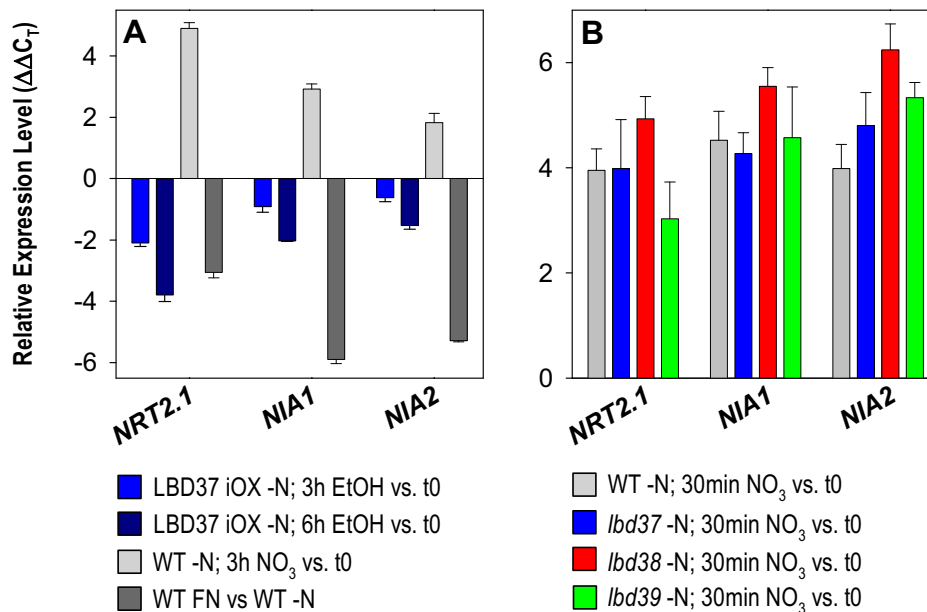

**Supplemental Figure 10.** Amino acid levels in *lbd* mutants as determined by HPLC.

Each bar shows the average  $\pm$  SD of three biological replicates from 9 day-old N-replete WT or *lbd* mutant shoots. The color legend is shown in the graph.

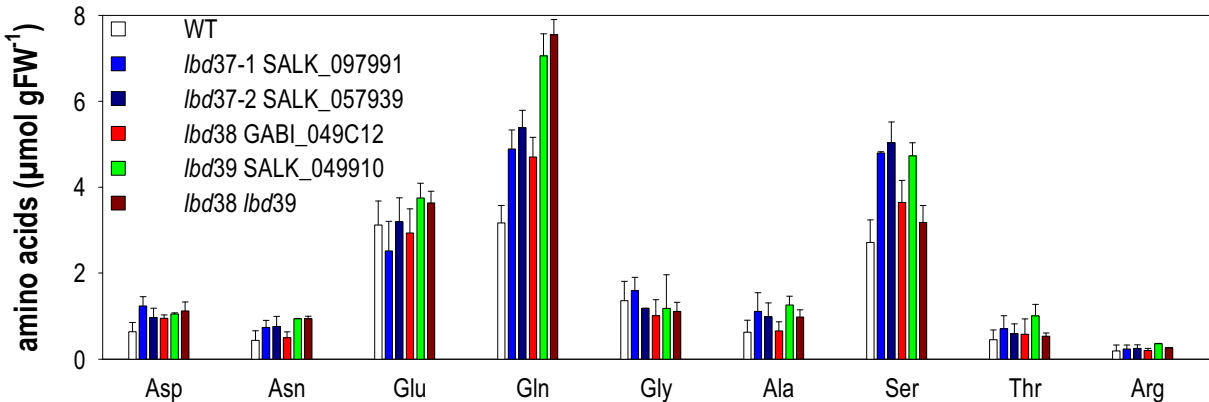

**Supplemental Figure 11.** Nitrogen-dependent basal shoot branching phenotype.

(A) N-dependent shoot branching of WT Col-0. (B) Shoot branching of WT, *LBD37*, *LBD38* and *LBD39* OX in N-limitation conditions (0% N). Bar = 5 cm in (A) and (B). (C) Plot of the number of basal shoot branches of wild-type, *LBD37*, *LBD38* and *LBD39* OXs against soil N-content (100% = 0.3 g  $\text{NH}_4\text{NO}_3 \text{ l}^{-1}$  soil; cf. Method section). Results represent mean values  $\pm$  standard deviations (n=20).

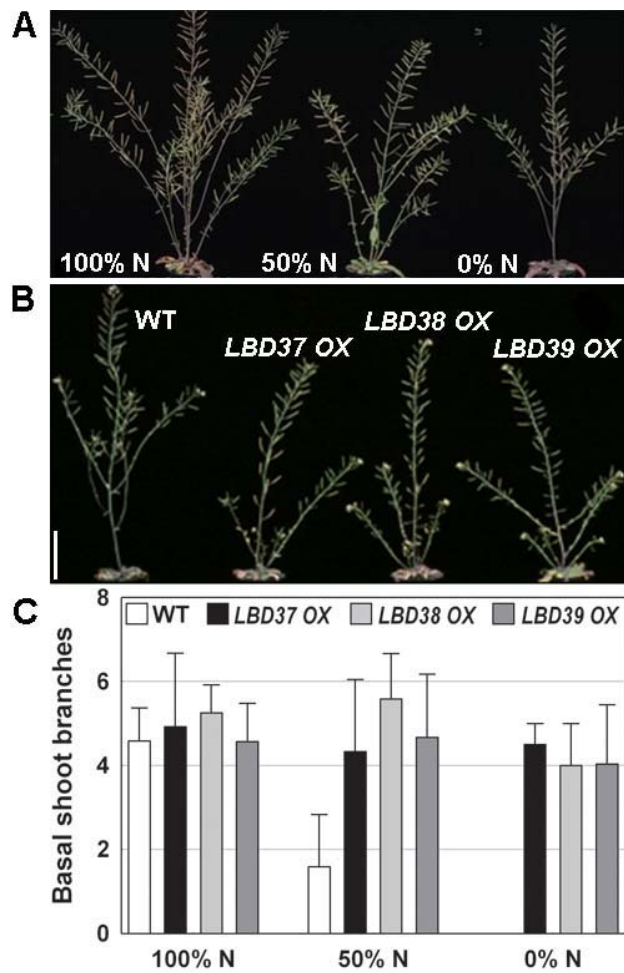

**Supplemental Figure 12.** Expression of *PAP1* and *PAP2* in *LBD37* over-expressers during environmental stress conditions.

Shown are the expression levels of *PAP1* and *PAP2* in WT (white bars) and *LBD37* over-expresser seedlings (blue bars) subjected to N-limitation (1), P-limitation (2), high sucrose (6% w/v; 3), cold (4°C; 4) or high light (5). Results for nutrient-replete (FN) WT and *pap1-D* over-expression lines (purple bars) are shown for comparison. Expression levels are given on a log scale expressed as  $40-\Delta C_T$ , (cf. legend to Supplemental Figure 9). The results are the mean  $\pm$  SD of three independent biological replicates/lines with two technical replicates for each.

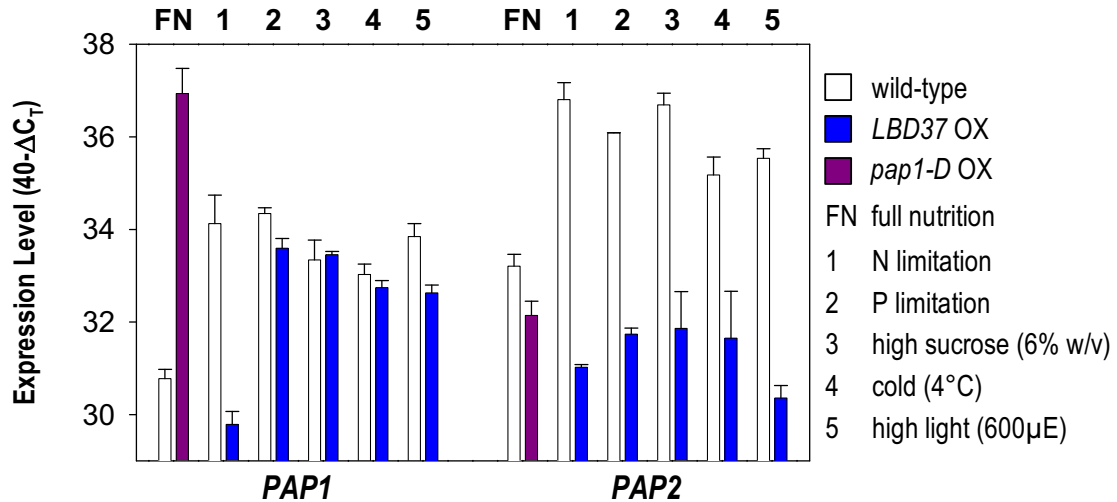

**Supplemental Table 1.** Accession numbers and primer sequences for (semi-) quantitative RT-PCR.

| AGI       | Gene Name        | Forward Primer             | Reverse Primer               | Primer* efficiency |
|-----------|------------------|----------------------------|------------------------------|--------------------|
| AT5G67420 | LBD37            | TGCTTTGTTTCAGTCGTTGCTC     | TGCTCCGTTAACTGGATTGACA       | 2.00               |
|           | 37a (cf. Fig. 2) | ACACCGTCGATGAACTCAGAGG     | TGTCACAAAACGCCGTCGT          | 1.95               |
|           | 37b (cf. Fig. 2) | CCCACCATTAACCAATTGTAAAACCT | GGATGCGTAACTATTTTGAGTTTATTCA | 1.94               |
|           | 37c (cf. Fig. 2) | XXXCTGCAATGGTTGCC          | YYTAACAAAAAGGTTAAGCAAGT      | n.a.               |
| AT3G49940 | LBD38            | TGCCCTGCTTTGTTTCAGTCTT     | CGTTCACCGGATTACAGTTCT        | 1.90               |
|           | 38a (cf. Fig. 2) | TCACTGCCGATTCTCAAGCTC      | GAGAGATCAAGCTCCGACGAA        | 1.93               |
|           | 38b (cf. Fig. 2) | XXXTTGCAATGGTTGCGA         | YYYCAAGCGAAGAGATTGAGCAA      | n.a.               |
| AT4G37540 | LBD39 (39a)      | GAACTCCAACGTCCTGCTTTGT     | ATACCAACCGCTCCGTTAACC        | 1.90               |
|           | 39b (cf. Fig. 2) | XXXTTGCAATGGATGTAGA        | YYTAACAAAAAGGTTCAATAACTT     | n.a.               |
| AT1G02860 | NLA              | n.a.                       | n.a.                         | n.a.               |
| AT1G02930 | GST6             | ACACAGGCTTGGTGAGTCCAA      | GCAACCCAAGCACTCACATGT        | 1.77               |
| AT1G02940 | GST5             | GTGAATGAAACCGAGGCGAAG      | CGCTTGCCGGTTTACAAA           | 1.81               |
| AT1G03495 | AAT1-like        | TTGGCAACTGTATGGCTCCTG      | GCAGCCATGACGCATTTTTTC        | 1.94               |
| AT1G03940 | AAT1             | AACAAAGGCCAACGAGGAAGA      | CAGGAGCCATACAGTTGCCAA        | 1.88               |
| AT1G06000 | UGT89C1          | TTCTTTAACACGACGCTCATCG     | CAAATCCTAGCGAGCTTGTC         | 1.90               |
| AT1G08090 | NRT2.1           | TTGCTTTCTCGTGCAATCAC       | TGCTCTGTGTCCACCGGAA          | 1.99               |
| AT1G08100 | NRT2.2           | GGAAAGATTCTATGGTACGCCG     | CGGCATAACATTGTCTGTGC         | 1.86               |
| AT1G12110 | NRT1.1           | CTGCCACACACTGAACAATTCC     | CCCGCTTCTGATCCCTTAT          | 1.90               |
| AT1G12940 | NRT2;5           | CGTTCTCTTGTTCGGTCAGGAT     | TCCAGATTTATGCATCGCCC         | 1.85               |
| AT1G22370 | UGT85A5          | AGATCGGTGGAGATGTGAGGA      | TGCCACTCTTCGGCCTTTT          | 1.83               |
| AT1G22640 | MYB3             | CTCCATAGCTTGTCCGTAACAA     | CTGTTCTTCTGGTAATCTCCCAG      | 1.62               |
| AT1G30530 | UGT78D1          | TGCTGAAACACGAGGCAATG       | ATCCGCCAAAATCGGTCTG          | 1.98               |
| AT1G34790 | TT1              | GCGATTGGCGAACACATGA        | CCCAAACGCCTTAATACATGGTC      | 1.80               |
| AT1G37130 | NIA2             | GCCGACGAAGAAGTTGGTGGTAT    | GAAGAATCTCCTCGTGACATGGCG     | 1.99               |
| AT1G51680 | 4CL1             | CGGCTGAGCTAGAGGCTTTG       | TCATTGCGACAACAGCAACAT        | 2.00               |
| AT1G56650 | PAP1/MYB75       | TGCTGGAAGATTACCTGGTCCG     | AGTGCCCGTGTGTAGGAATG         | 2.00               |
| AT1G61720 | BAN              | CCGTGATTCCGGCACTTATAG      | TCACATGCATTTCTTTCCCG         | 2.00               |
| AT1G63650 | EGL1/3           | CATCAGCTAATACTCGGACCCG     | TCTGCGATTTCTCTCCCAATGT       | 1.93               |
| AT1G65060 | 4CL3             | GCTGTTGTTCCGCAAAATGA       | GAACACCACCTGTTTGCAA          | 2.00               |
| AT1G66390 | PAP2/MYB90       | TCCTTCATGCCTTGGACTCAA      | CAAAGTGCCCATGTTCA            | 1.96               |
| AT1G77760 | NIA1             | GGCTACGCTTATTCTGGAGGAGGT   | TGGTGGTCAAGCTCACAACACTC      | 1.90               |
| AT2G22590 | UGT91A1          | GTTCTGACTCATCCCGTTGG       | CCAGCATTGCCATCGGTTTA         | 1.90               |
| AT2G29750 | UGT71C1          | CGGAACAACAATAAACGCGT       | AACGGTTCCTGCGATCTCATC        | 1.83               |
| AT2G30490 | C4H              | TGGTGTGGACGTCGAAGC         | CCTACCAATGGTGATCCCA          | 1.95               |
| AT2G37040 | PAL1             | CTTGAACAGAGCTTTTGACCG      | CGTGAAAACCTTGTCGAATCTTC      | 1.91               |
| AT2G37260 | TTG2/WRKY44      | CGGTTGCAAGAGTAGCCAATG      | CCTTGCGATACTCCTGCTTCA        | 1.90               |
| AT2G47460 | MYB12            | AACAGGTGGTCACTAATCGCG      | TTCTGTTGCTGTTCTCCCTGG        | 1.97               |
| AT3G17609 | HYH/bZIP         | CTGCAGCTGGATCAACATGTGT     | GCGGCGTTTAGCTGTAGAGACT       | 1.89               |
| AT3G21240 | 4CL2             | TGATGTTGCTGTCGTCGCC        | CCACAAACGCAACAGGAACC         | 1.97               |
| AT3G21560 | UGT84A2          | TGTGGATGGAACCAACGATG       | TCACTCCCGTCTTCCAAACAT        | 1.91               |
| AT3G27920 | GL1/MYB0         | CCGTGATTGTTCACTACTGCC      | GCTGATACGACCGGTTAAAG         | 1.87               |

|           |              |                            |                              |      |
|-----------|--------------|----------------------------|------------------------------|------|
| AT3G29590 | AAT          | TGTGTGCGTTGGTTTTGCAT       | GCTTTCACGTGCGAAATCTCCC       | 2.00 |
| AT3G50210 | FLS putative | CGTTTGTTTGCAACATCGGT       | CCGCGTCGAAGTTAGTCTCAT        | 1.86 |
| AT3G51240 | F3H/TT6      | GCTACAAGACCAAGTCGGTGA      | GCTCAAAAATGGCCGTGG           | 1.89 |
| AT3G53260 | PAL2         | AACTGCGCCGATTCTAACC        | TTCCAAGCTCTCCCTCACG          | 1.90 |
| AT3G55120 | CHI/TT5      | CTCTCTTACGGTTGCGTTTTCG     | CACCGTCTTCCCGATGATAGA        | 1.89 |
| AT3G62610 | MYB11        | GGCGATTGTAACCCAAGCATT      | TCACATGAGGACACGTGGACA        | 1.89 |
| AT4G00730 | ANL2/HD      | AACGAACGGATGAGATGCGA       | TCATTGCATTGGAGCGGAG          | 1.85 |
| AT4G01070 | UGT72B1      | GTGAAGATATTCGTGCGGCAC      | CCTTTGCCTTCTCACCTTCC         | 1.84 |
| AT4G04750 | GLUT8        | TGGAGGCGTTTTAGGTGTTTTG     | CCCAGCAATTGTTCTTCTGCA        | 1.90 |
| AT4G05320 | UBQ10        | GGCCTTGATAATCCCTGATGAATAAG | AAAGAGATAACAGGAACGGAAACATAGT | 2.00 |
| AT4G09820 | bHLH TT8     | TGGAGACACCATTGCGTACGT      | TCTTACAAGTACGCGTCCGCT        | 1.83 |
| AT4G14090 | UGT75C1      | TTTTGGCGCATTGTGCTGT        | TCAGCAAACCTGCGGAAACG         | 1.79 |
| AT4G15480 | UGT84A1      | ATTGGTGCCACACAAGAGCAA      | CCGGAACACCTGAAGACAAAGA       | 1.95 |
| AT4G22870 | ANS/TT18     | GGCTGTGTTTTGTGAGCCACCA     | CCTTGGAGGAAACTTAGCCGAGA      | 1.83 |
| AT4G34135 | UGT73B2      | ATACTTGACCACCAAGCAACCG     | TCCTACAGGCCATGTCACCATT       | 1.92 |
| AT4G34990 | MYB32        | GGCAAGACAAGCTCCATGATG      | ACAGCTACACTCCTTGCCGTTC       | 1.96 |
| AT4G38620 | MYB4         | GCCACGTGTTTCAAGTGCA        | TCCATTGCTCATGTCACCTCCC       | 1.87 |
| AT5G04230 | PAL3         | ATCCGCTGTACCGGTTTGTG       | TCTCCCGGTGACCGAACAT          | 1.84 |
| AT5G07990 | F3H/TT7      | TTCTTACCTTCAGGCGTTATC      | CGAGAGTGGTGTGGTGGATG         | 1.91 |
| AT5G08640 | FLS1         | TTCTGAGGTTGAGTAATGGGAGG    | CCGTCGTCCTATGCAACACAT        | 1.93 |
| AT5G11260 | HY5bZIP      | TAGAGAATCTGGATCGGCGACC     | CTCAACAACCTTTCAGCCGCT        | 1.85 |
| AT5G13110 | G6PD2        | ACAAATCCCCGGAACATGCCTGA    | CACTACACACCAGGAGTGCAGAGA     | 1.85 |
| AT5G13930 | CHS/TT4      | GGAGAAGTTCAAGCGCATGTG      | ATGTGACGTTTCCGAATTGTCG       | 1.97 |
| AT5G14750 | WER/MYB66    | TCACCGAGCAAGAAGAGGATCT     | CACCTGATTATCCGTTCCGACCC      | 1.92 |
| AT5G16570 | GLN1;4       | GGCCAACTACCGGCCACTTAATA    | TGTCGCCGAAGAAACATGGTACG      | 1.79 |
| AT5G17030 | UGT78D3      | ATACTTGACCACCAAGCAACCG     | TCCTACAGGCCATGTCACCATT       | 1.82 |
| AT5G17050 | UGT78D2      | CGGTGTTGGAGAGTGTATCGG      | TGATCCCCAAAAATGGCC           | 1.90 |
| AT5G17220 | GST26/TT19   | TGGCTGATTTGACGCACATG       | CCCAGCCTTAACCATCTGG          | 1.90 |
| AT5G24520 | TTG1/WD40    | TCGATATTCGTTCCCGACT        | GCCTGTGTATCATCACCACCAG       | 2.00 |
| AT5G35550 | TT2/MYB123   | CCGCAAAAGACTTCCCAAAA       | GCACCTAATCGCCTTTGTACGT       | 1.95 |
| AT5G41315 | GL3          | TCGGTTCGTTTGGTAATGAGG      | GCTTGCAATTGACGGTTAAGC        | 1.83 |
| AT5G42800 | DFR/TT3      | CGTTTGAAGGTGTTGATGAGAATC   | TCCGTCAGCTTCTTGGAAGT         | 1.95 |
| AT5G49330 | MYB111       | CGGCCTCACAATGTTTCTCAC      | CCACTCATAAGGCCCAAAGA         | 1.88 |
| AT5G54060 | UGT79B1      | CAGCAACCGTTGGTGTGAAC       | GCGGAACCAAAACGATCTGAC        | 1.95 |
| AT5G65550 | UGT 91B1     | AGCCATGGTTCAGTTGGTGG       | CACCAAAGCTAAGCCCTTCCA        | 1.87 |

\*Primer efficiency was determined using LinRegPCR (Ramakers *et al.*, 2003).

XXX = GGAGATAGAACCATGAG; YYY = CAAGAAAGCTGGGTCT. Primers for semi-quantitative PCR (cf. Figure 2C, D) are shown in grey letters. n.a. = not applicable/analyzed.
